# Supplementary material
Source: HighWire-hosted journal article supplement (http://dmd.aspetjournals.org/highwire/filestream/68099/field_highwire_adjunct_files/0/Supplemental_72736.pdf)
Supplement: Supplemental_72736.pdf [file Supplemental_72736.pdf]

Supplemental data to:

Establishment and characterization of a novel Caco-2 subclone with a similar low expression level of human carboxylesterase 1 to human small intestine

Kayoko Ohura, Hikaru Nishiyama, Saori Saco, Keisuke Kurokawa, Teruko Imai

Graduate School of Pharmaceutical Sciences, Kumamoto University, Kumamoto, Japan

**Corresponding Author:**

Teruko Imai, Ph.D., Professor

Graduate School of Pharmaceutical Sciences, Kumamoto University

5-1 Oe-Honmachi, Chuo-ku, Kumamoto, 862-0973, Japan.

Phone: +81-96-371-4626, Fax: +81-96-371-4639

E-mail: [iteruko@gpo.kumamoto-u.ac.jp](mailto:iteruko@gpo.kumamoto-u.ac.jp)

**Journal:**

Drug Metabolism and Disposition

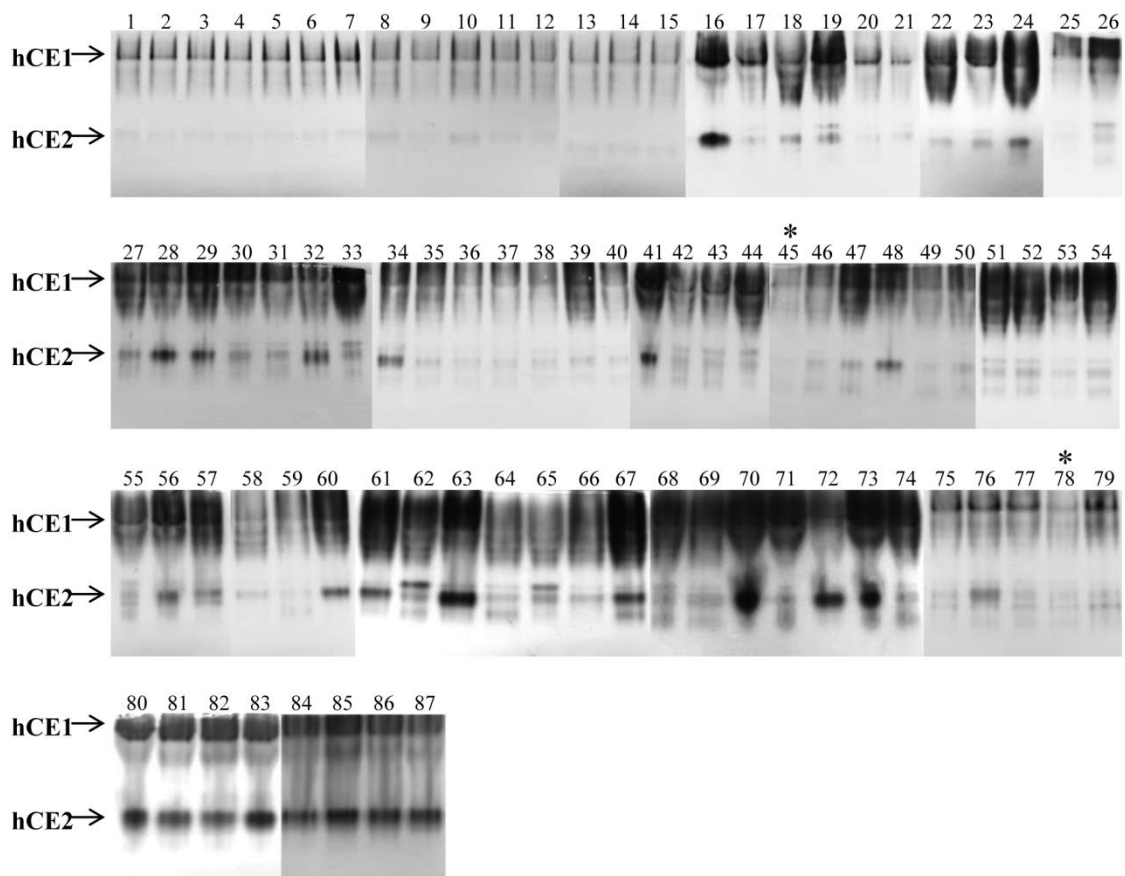

**Supplemental Figure 1. Expression of hCE1 and hCE2 in Caco-2 subclones**

Esterase activity staining after native PAGE using  $\alpha$ -naphthylacetate. Homogenates of the subclones (#1–#15, 10  $\mu$ g; #16–#87, 50  $\mu$ g) were loaded onto each lane. Arrows indicate bands corresponding to each CES isozyme. \* denotes the selected subclones.

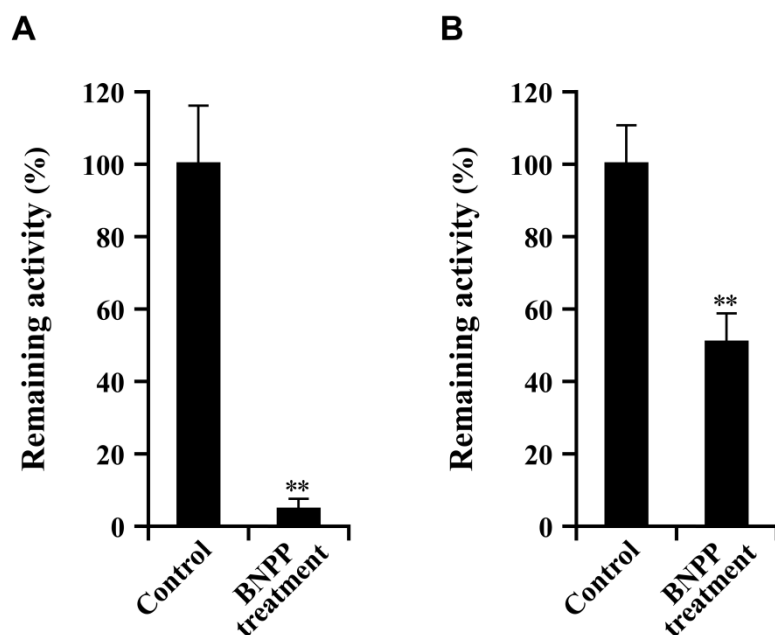

**Supplemental Figure 2. Hydrolysis of oseltamivir (A) and PNPA (B) in S9 fractions of Caco-2 cells treated with BNPP**

S9 fractions were prepared from Caco-2 cell monolayers treated with HBSS (control) or 200  $\mu$ M BNPP. S9 fractions were diluted with 50 mM HEPES buffer (pH 7.4) at 100  $\mu$ g/mL. Substrates (concentration of oseltamivir and PNPA: 500  $\mu$ M) were incubated with the diluted S9 fractions. Each column represents the mean  $\pm$  S.D. ( $n = 3$ ). “\*\*\*” indicates  $p < 0.01$  in comparison with control.

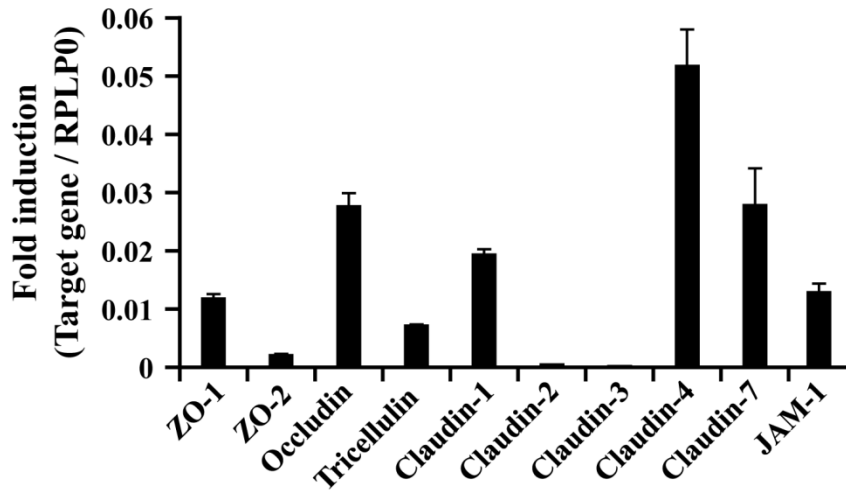

**Supplemental Figure 3. Expression profile of tight junction components in parental Caco-2 cells**

The mRNA expression levels of tight junction components were determined by real-time quantitative PCR and normalized to the expression level of RPLP0 mRNA. Values are means  $\pm$  S.D. ( $n = 3$ ).

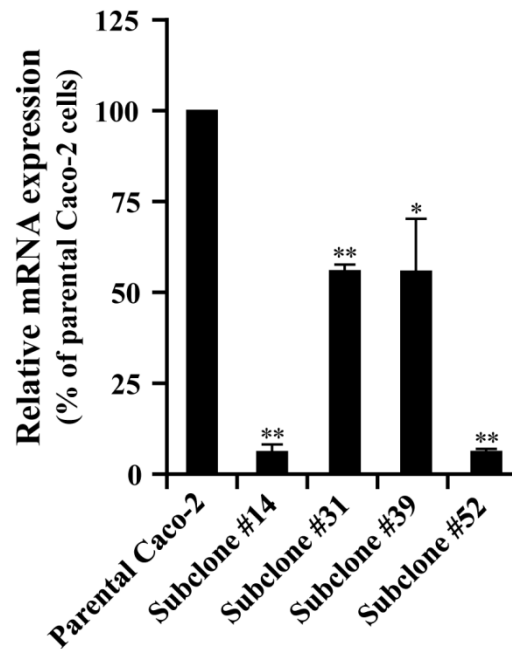

**Supplemental Figure 4. Relative expression levels of ZO-1 in Caco-2 subclones**

The mRNA expression levels in subclone #14, #31, #39 and #52, which showed slower growth than parental Caco-2 cells, were determined by real-time quantitative PCR. The fold induction of mRNA level of ZO-1 normalized to the RPLP0 mRNA level in parental Caco-2 cells (control) is set as 100%, and that in each subclone is shown relative to control. Values are means  $\pm$  S.D. ( $n = 3$ ). \*\* indicates  $p < 0.01$ ; \* indicates  $p < 0.05$ , both in comparison with parental Caco-2 cells.

**Supplemental Table 1. Effect of 5-azacytidine and sodium butyrate on the mRNA expression of human CES isozymes in subclone #78**

| CES isozymes  | 5-Azacytidine                              |                 | Sodium butyrate                  |                 |
|---------------|--------------------------------------------|-----------------|----------------------------------|-----------------|
|               | Control<br>(DMSO 0.1%)                     | 5 $\mu$ M       | Control<br>(H <sub>2</sub> O 1%) | 5 mM            |
|               | (% of average expression level of control) |                 |                                  |                 |
| <i>CES1A1</i> | 100 $\pm$ 16.9                             | 93.9 $\pm$ 33.2 | 100 $\pm$ 36.7                   | 94.0 $\pm$ 22.9 |
| <i>CES2A1</i> | 100 $\pm$ 21.1                             | 83.3 $\pm$ 30.5 | 100 $\pm$ 16.2                   | 86.6 $\pm$ 22.0 |

The mRNA expression levels were determined by real-time quantitative PCR and normalized to the expression level of  $\beta$ -actin mRNA. The average relative mRNA expression level in the control was set as 100%. Values represent the mean  $\pm$  S.D. ( $n = 3$ ). There were no significant differences in the expression of either CES isozyme between controls and cells treated with gene inducers.
